# Supplementary material for: Different Diets Modulate the Gut Microbiome Compositions and Promote the Health of <em>Apis mellifera</em>
Source: Preprints.org preprint supplement (doi:10.20944/preprints202311.1687.v1), 2023-11-27
Supplement: Supplementary file 1 [file Maigoro et al Table S1.docx]

**Table S1.** Primer information for DWV, Vg, and *ß-actin*

| Gene |  | Primer sequence (5’-3’) | Size (bp) |
| --- | --- | --- | --- |
| DWV | F  R | CGAAACCAACTTCTGAGGAA  GTGTTGATCCCTGAGGCTTA | 174 |
| Vg | F  R | GTTGGAGAGCAACATGCAGA  TCGATCCATTCCTTGATGGT | 150 |
| *ß-actin* | F  R | AGGAATGGAAGCTTGCGGTA  AATTTTCATGGTGGATGGTGC | 181 |
