# Supplementary material for: Different Diets Modulate the Gut Microbiome Compositions and Promote the Health of <em>Apis mellifera</em>
Source: Preprints.org preprint supplement (doi:10.20944/preprints202311.1687.v1), 2023-11-27
Supplement: Supplementary file 2 [file Maigoro et al Table S2.docx]

**TableS2*.*** Primer for amplifying V3-V4 region

| Primer | Sequence (5-------->3) |
| --- | --- |
| 16S v34_F | TCGTCGGCAGCGTCAGATGTGTATAAGAGACAGCCTACGGGNGGCWGCAG |
|  | TCGTCGGCAGCGTCAGATGTGTATAAGAGACAGNCCTACGGGNGGCWGCAG |
|  | TCGTCGGCAGCGTCAGATGTGTATAAGAGACAGNNCCTACGGGNGGCWGCAG |
|  | TCGTCGGCAGCGTCAGATGTGTATAAGAGACAGNNNCCTACGGGNGGCWGCAG |
| 16S v34_R | GTCTCGTGGGCTCGGAGATGTGTATAAGAGACAGGACTACHVGGGTATCTAATCC |
|  | GTCTCGTGGGCTCGGAGATGTGTATAAGAGACAGNGACTACHVGGGTATCTAATCC |
|  | GTCTCGTGGGCTCGGAGATGTGTATAAGAGACAGNNGACTACHVGGGTATCTAATCC |
|  | GTCTCGTGGGCTCGGAGATGTGTATAAGAGACAGNNNGACTACHVGGGTATCTAATCC |
