# Supplementary material for: Different Diets Modulate the Gut Microbiome Compositions and Promote the Health of <em>Apis mellifera</em>
Source: Preprints.org preprint supplement (doi:10.20944/preprints202311.1687.v1), 2023-11-27
Supplement: Supplementary file 3 [file Maigoro et al Table S3.docx]

| **Sample-id** | **Input** | **Filtered** | **Percentage of input passed filter** | **Denoised** | **Merged** | **Percentage of input merged** | **Non-chimeric** | **Percentage of input non-chimeric** |
| --- | --- | --- | --- | --- | --- | --- | --- | --- |
| 60%Syrup1 | 116773 | 82815 | 70.92 | 81626 | 77141 | 66.06 | 11476 | 9.83 |
| 60%Syrup2 | 96009 | 69697 | 72.59 | 68837 | 64983 | 67.68 | 10024 | 10.44 |
| 60%Syrup3 | 91524 | 66295 | 72.43 | 65650 | 63733 | 69.64 | 12559 | 13.72 |
| AIGT+Applejuice1 | 112324 | 83303 | 74.16 | 82052 | 75119 | 66.88 | 7440 | 6.62 |
| AIGT+Applejuice2 | 98331 | 72881 | 74.12 | 71845 | 66993 | 68.13 | 10673 | 10.85 |
| AIGT+Applejuice3 | 101115 | 74110 | 73.29 | 72831 | 67794 | 67.05 | 8243 | 8.15 |
| Beebread and honey1 | 92773 | 71110 | 76.65 | 70123 | 66728 | 71.93 | 12586 | 13.57 |
| Beebread and honey2 | 97375 | 72476 | 74.43 | 71428 | 65950 | 67.73 | 6860 | 7.04 |
| Beebread and honey3 | 107285 | 77432 | 72.17 | 76315 | 71344 | 66.5 | 8047 | 7.5 |
| AIGT+MAC1 | 121929 | 89586 | 73.47 | 88326 | 82205 | 67.42 | 11723 | 9.61 |
| AIGT+MAC2 | 101934 | 74692 | 73.27 | 74623 | 71058 | 69.71 | 11496 | 11.28 |
| AIGT+MAC3 | 104770 | 78053 | 74.5 | 76799 | 70603 | 67.39 | 11693 | 11.16 |
| Megabee1 | 115335 | 85346 | 74 | 84205 | 77330 | 67.05 | 7094 | 6.15 |
| Megabee2 | 87130 | 65763 | 75.48 | 64984 | 62078 | 71.25 | 7604 | 8.73 |
| Megabee3 | 78792 | 58367 | 74.08 | 57877 | 55729 | 70.73 | 9310 | 11.82 |
| AIGT+SAC1 | 103635 | 78153 | 75.41 | 77461 | 74256 | 71.65 | 9460 | 9.13 |
| AIGT+SAC2 | 96173 | 72330 | 75.21 | 71724 | 67975 | 70.68 | 12876 | 13.39 |
| AIGT+SAC3 | 100074 | 72950 | 72.9 | 72617 | 63419 | 63.37 | 9114 | 9.11 |
| AIGT+Soytide1 | 82348 | 61006 | 74.08 | 60778 | 59577 | 72.35 | 14016 | 17.02 |
| AIGT+Soytide2 | 116515 | 85883 | 73.71 | 85528 | 79363 | 68.11 | 10469 | 8.99 |
| AIGT+Soytide3 | 110698 | 78152 | 70.6 | 77406 | 73649 | 66.53 | 8006 | 7.23 |

**TableS3.** The table indicates the summary of the Next-generation sequencing (NGS) analysis with a total of 21 samples. 60%Syrup samples (*n* = 3); AIGT+Applejuice samples (*n* = 3); Beebread and honey samples (*n* = 3); AIGT+MAC samples (*n* = 3); Megabee samples (*n* = 3); AIGT+SAC samples (*n* = 3), and AIGT+Soytide samples (*n* = 3). DADA2 output after removing the chimeric reads returned an average of 71,394 reads from the 21 samples.
