# Supplementary material for: Different Diets Modulate the Gut Microbiome Compositions and Promote the Health of <em>Apis mellifera</em>
Source: Preprints.org preprint supplement (doi:10.20944/preprints202311.1687.v1), 2023-11-27
Supplement: Supplementary file 4 [file Tablee S4.xlsx]

## Sheet: Sheet1
Table S4. Showing the commonly distributed taxa among the diet groups
index	g__Lactobacillus	f__Rhizobiaceae;__	g__Snodgrassella	g__Commensalibacter	f__Erwiniaceae;__	g__Frischella	o__Enterobacterales;__;__	g__Bombella	g__Bifidobacterium	g__Gilliamella	g__Trifolium repens	g__Pseudomonas	g__Bacillus	g__Staphylococcus	g__Trifolium aureum	d__Bacteria;__;__;__;__;__	f__Enterobacteriaceae;__	g__Enterococcus	g__Pantoea	g__Orbaceae	f__Acetobacteraceae;__	d__Bacteria;p__Proteobacteria;c__Alphaproteobacteria;__;__;__	d__Bacteria;p__Proteobacteria;__;__;__;__	f__Orbaceae;__	g__Rosenbergiella	d__Bacteria;p__Proteobacteria;c__Gammaproteobacteria;__;__;__	g__Lactococcus	o__Lactobacillales;__;__	f__Neisseriaceae;__	g__Pediococcus	d__Bacteria;p__Firmicutes;c__Bacilli;__;__;__	g__Methylobacterium-Methylorubrum	g__Tyzzerella	g__Globicatella	g__Incertae_Sedis	g__Clostridium_sensu_stricto_12	g__Prevotella
60%Syrup1	5183	4202	0	545	0	67	56	78	153	1043	2	0	70	0	0	0	0	0	0	19	27	0	0	31	0	0	0	0	0	0	0	0	0	0	0	0	0
60%Syrup2	3793	4292	934	148	0	58	0	51	132	614	0	0	0	0	0	0	0	0	0	0	0	0	0	0	0	0	0	0	2	0	0	0	0	0	0	0	0
60%Syrup3	2438	8400	725	75	0	404	414	26	0	75	0	0	0	0	0	0	0	0	0	0	0	0	0	2	0	0	0	0	0	0	0	0	0	0	0	0	0
AIGT+Applejuice1	5602	0	701	184	0	0	0	124	343	361	13	0	17	0	13	0	0	0	0	0	34	0	0	0	0	0	0	0	20	18	10	0	0	0	0	0	0
AIGT+Applejuice2	5935	3471	130	11	0	147	412	34	96	238	15	106	0	0	0	2	0	0	0	0	0	0	0	3	37	13	0	0	2	15	0	0	6	0	0	0	0
AIGT+Applejuice3	6531	35	0	50	0	550	43	584	269	30	0	0	0	0	0	20	0	0	0	0	120	0	0	2	0	0	0	0	0	9	0	0	0	0	0	0	0
Beebreadhoney1	1266	9769	712	0	0	169	0	0	139	87	226	0	0	0	105	6	0	0	0	0	0	51	53	0	0	0	0	0	3	0	0	0	0	0	0	0	0
Beebreadhoney2	3324	93	481	72	0	2114	0	0	374	252	24	0	0	0	2	4	0	0	0	74	0	0	0	46	0	0	0	0	0	0	0	0	0	0	0	0	0
Beebreadhoney3	6584	0	301	103	0	561	0	0	237	48	112	0	0	0	23	58	0	0	0	0	0	0	0	0	0	0	0	0	20	0	0	0	0	0	0	0	0
AIGT+MAC1	4902	4752	1207	15	0	176	0	346	210	76	0	0	0	0	0	0	0	0	0	0	33	0	0	0	0	0	0	0	6	0	0	0	0	0	0	0	0
AIGT+MAC2	26	0	0	0	11233	0	28	0	0	0	5	0	94	0	14	20	71	0	0	0	0	0	0	0	0	0	0	0	0	0	0	0	0	0	0	5	0
AIGT+MAC3	10152	112	419	58	0	0	116	217	368	86	44	0	75	0	37	0	0	0	0	0	0	0	0	0	0	0	0	1	8	0	0	0	0	0	0	0	0
Megabee1	4894	0	687	0	0	671	293	38	201	63	15	57	0	0	0	83	0	0	56	0	0	0	0	0	0	2	0	21	13	0	0	0	0	0	0	0	0
Megabee2	5414	0	0	380	0	1244	39	0	153	281	0	0	91	0	0	0	0	0	0	0	0	0	0	2	0	0	0	0	0	0	0	0	0	0	0	0	0
Megabee3	1201	6339	792	0	0	823	0	0	0	131	0	0	0	0	0	24	0	0	0	0	0	0	0	0	0	0	0	0	0	0	0	0	0	0	0	0	0
AIGT+SAC1	8623	0	265	10	0	3	0	182	282	0	0	0	25	6	0	13	0	0	0	0	0	0	48	0	0	0	0	0	3	0	0	0	0	0	0	0	0
AIGT+SAC2	11957	6	0	0	16	0	56	177	365	0	0	0	51	0	0	73	0	0	115	0	36	0	0	0	0	0	0	0	0	0	18	6	0	0	0	0	0
AIGT+SAC3	7901	0	0	57	0	0	0	0	134	590	10	53	159	134	21	0	0	0	0	0	0	0	0	0	0	0	25	0	0	0	0	15	0	6	6	0	3
AIGT+Soytide1	13434	0	0	0	0	0	0	441	0	0	0	43	40	0	0	14	0	0	0	0	0	0	0	0	0	37	0	0	0	7	0	0	0	0	0	0	0
AIGT+Soytide2	8133	0	0	1683	0	413	0	0	0	71	21	0	5	38	0	3	0	0	87	0	0	0	0	0	0	0	0	0	0	0	15	0	0	0	0	0	0
AIGT+Soytide3	6872	0	0	0	0	82	0	740	177	0	0	42	22	0	0	0	0	71	0	0	0	0	0	0	0	0	0	0	0	0	0	0	0	0	0	0	0
NOTE: Red color taxa indicates those taxa present in all the diet groups.
